# Supplementary material for: Differences in Hedonic Responses, Facial Expressions and Self-Reported Emotions of Consumers Using Commercial Yogurts: A Cross-Cultural Study
Source: Foods. 2021 May 29;10(6):1237. doi: 10.3390/foods10061237 (PMC8227163; doi:10.3390/foods10061237)
Supplement: Supplementary file 1 [file foods-10-01237-s001.zip › foods-1200284-supplementary.pdf]

## Supplementary Data

**Table S1.** List of check-all-that-apply (CATA) emotion terms given to the consumers.

| Positive   | Neutral     | Negative    |
|------------|-------------|-------------|
| Cheerful   | Neutral     | Nasty       |
| Luxury     | Guilt-free  | Deceitful   |
| Trusted    | Basic       | Pretentious |
| Uplifting  | Indifferent | Cheap       |
| Dependable | Common      | Artificial  |

**Table S2.** List of check-all-that-apply (CATA) emojis given to the consumers.

| Classification | Emoticon                                                                            | Meaning (or description)     |
|----------------|-------------------------------------------------------------------------------------|------------------------------|
| Positive       | 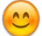   | smiling face                 |
|                | 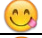   | savoring delicious food      |
|                | 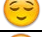   | relieved face                |
|                | 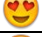   | heart-shaped eyes            |
|                | 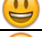   | smiling face with mouth open |
| Negative       | 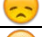   | disappointed                 |
|                | 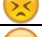   | persevering face             |
|                | 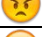   | angry face                   |
|                | 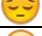 | pensive face                 |
|                | 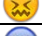 | confounded face              |
|                | 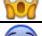 | screaming in fear            |
|                | 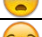 | fearful                      |
| Unclassified   | 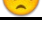 | unamused                     |

**Table S3.** List of emotions (unconscious responses) represented by FaceReader™

| Neutral  | Happy     | Sad       | Angry  |
|----------|-----------|-----------|--------|
| Contempt | Surprised | Disgusted | Scared |

**Table S4.** Purchase Intent of yogurts as rated by participants

| Product code | Mean Score               |
|--------------|--------------------------|
| Reference    | 2.60 ± 1.25 <sup>b</sup> |
| Coconut      | 1.97 ± 1.17 <sup>c</sup> |
| Drinkable    | 2.76 ± 1.22 <sup>b</sup> |
| Soy          | 2.52 ± 1.26 <sup>b</sup> |
| Cookies      | 3.63 ± 1.04 <sup>a</sup> |
| Berry        | 1.10 ± 0.30 <sup>d</sup> |

<sup>a, b, c, d</sup> Means with different superscripts in each column indicate significant differences ( $p < 0.05$ ) by the Fischer's LSD test. Highest value with 'a' in super-script. The rating scales from 1–5 is mentioned below:

| Not at all likely | Not so likely | Somewhat likely | Very likely | Extremely likely |
|-------------------|---------------|-----------------|-------------|------------------|
| 1                 | 2             | 3               | 4           | 5                |

**Table S5.** Price Perception of yogurts as rated by participants in reference to their regular yogurts (all values are in percentages)

| Product code | Wouldn't buy | Less | Same        | More |
|--------------|--------------|------|-------------|------|
| Reference    | 32.3         | 22.6 | <b>41.9</b> | 3.2  |
| Coconut      | <b>58.1</b>  | 12.9 | 24.2        | 4.8  |
| Drinkable    | 24.2         | 33.9 | <b>38.7</b> | 3.2  |
| Soy          | 30.6         | 22.6 | <b>35.5</b> | 11.3 |
| Cookies      | 4.8          | 17.7 | <b>59.7</b> | 17.7 |
| Berry        | <b>91.9</b>  | 6.5  | 1.6         | 0.0  |

*The rating scales explanation is mentioned below:*

| Price Perception Label | Price Perception by Consumers                                 |
|------------------------|---------------------------------------------------------------|
| Wouldn't buy           | Wouldn't want to buy when compared to their regular yogurts   |
| Less                   | Would pay less as compared to their regular yogurts           |
| Same                   | Would pay the same value as compared to their regular yogurts |
| More                   | Willing to pay more as compared to their regular yogurts      |

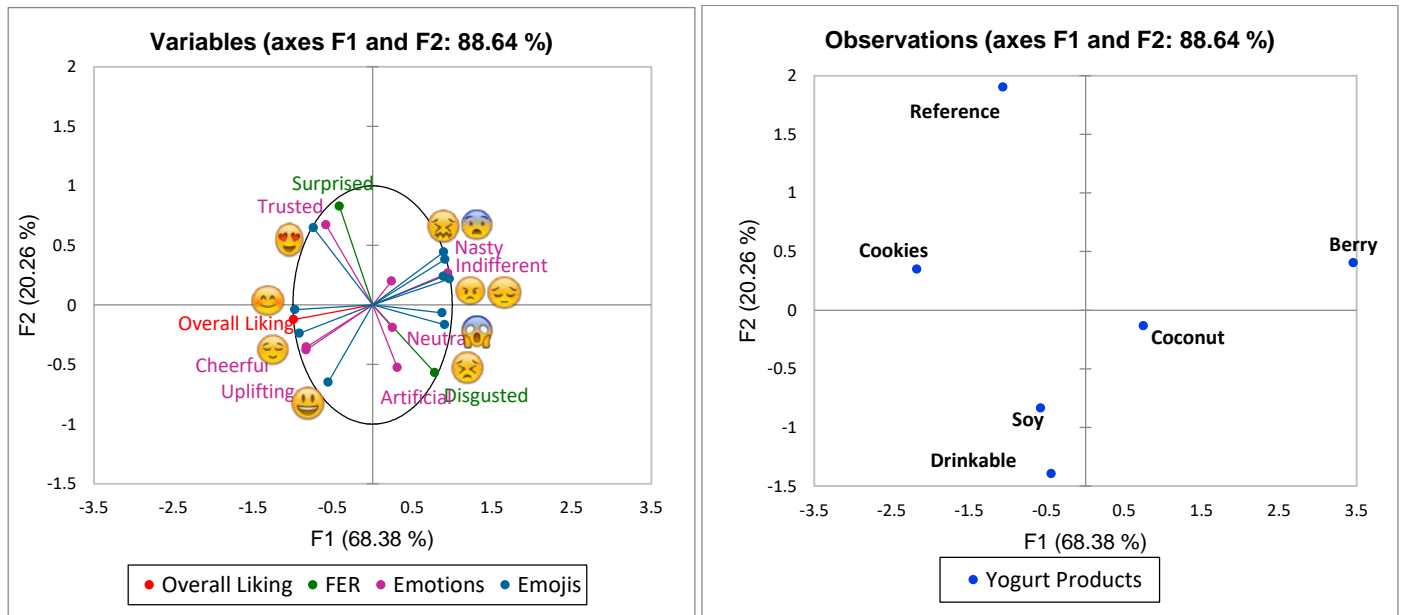

**Figure S1.** Multifactor analysis for a combination of CATA – emotions, CATA – emojis and FER with overall liking (a – variables, b – yogurt products) for Westerns participants.

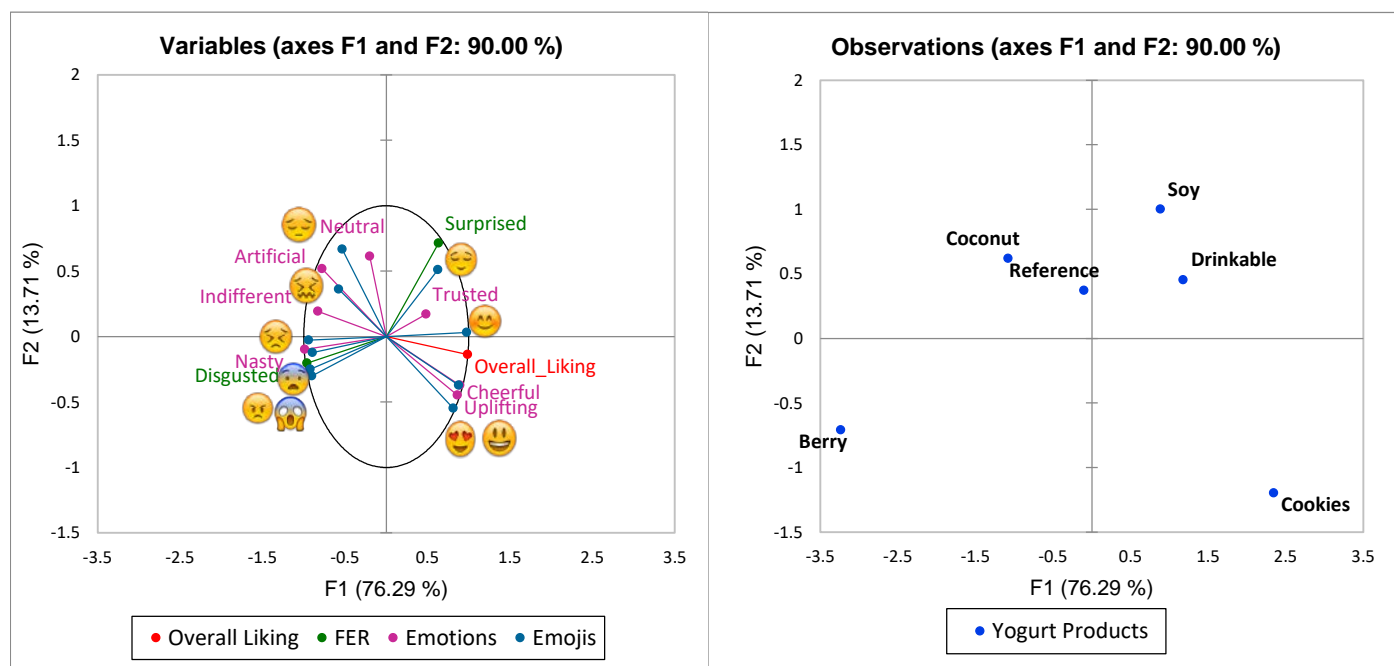

**Figure S2.** Multifactor analysis for a combination of CATA – emotions, CATA – emojis and FER with overall liking (a – variables, b – yogurt products) for Asian participants
